# Supplementary material
Source: Springer Nature journal article supplement (https://www.springermedizin.de/resource/supplementary/13014_2012_821_MOESM2_ESM.pdf/9634790)

TW

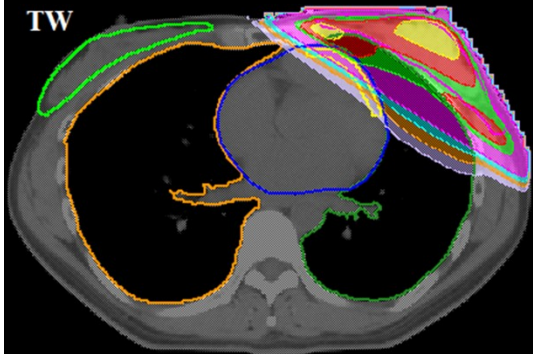

FIF

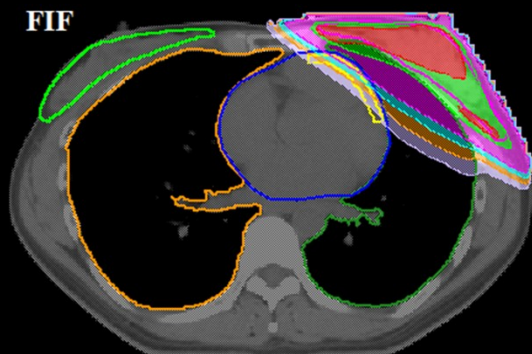

1IMRT

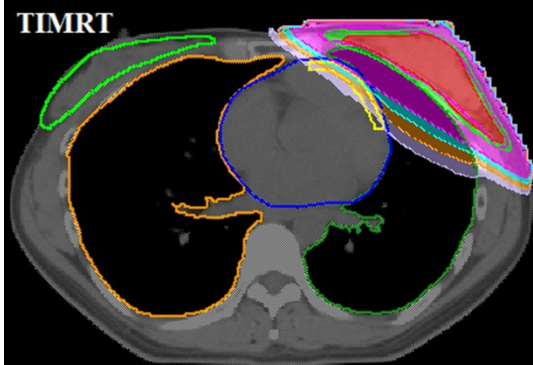

7IMRT

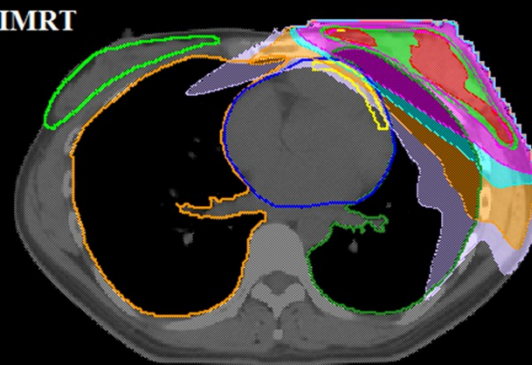

VMAT

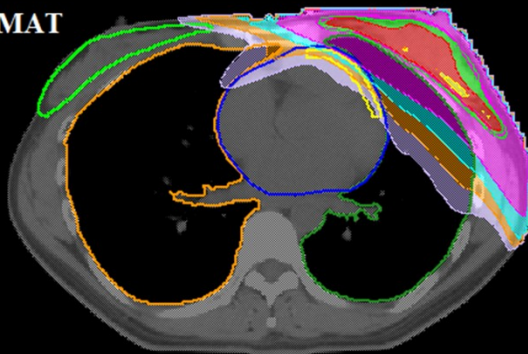

5000.0 cGy

4750.0 cGy

5250.0 cGy

2000.0 cGy

1000.0 cGy

500.0 cGy

300.0 cGy

Supplement: MOESM2 [file 9634790]
